# Supplementary material
Source: PubMed Central journal article supplement (PMC5646689)
Supplement: NIHMS871811-supplement-Supp_info.pdf [file NIHMS871811-supplement-Supp_info.pdf]

**Metabolomic Profiles of Current Cigarette Smokers (MS# MC-16-0012)**

**Hsu et al., Supplemental information.**

Figures (S1–S10), p2–p12

Table (S1–S4), p13–p16

## Figures

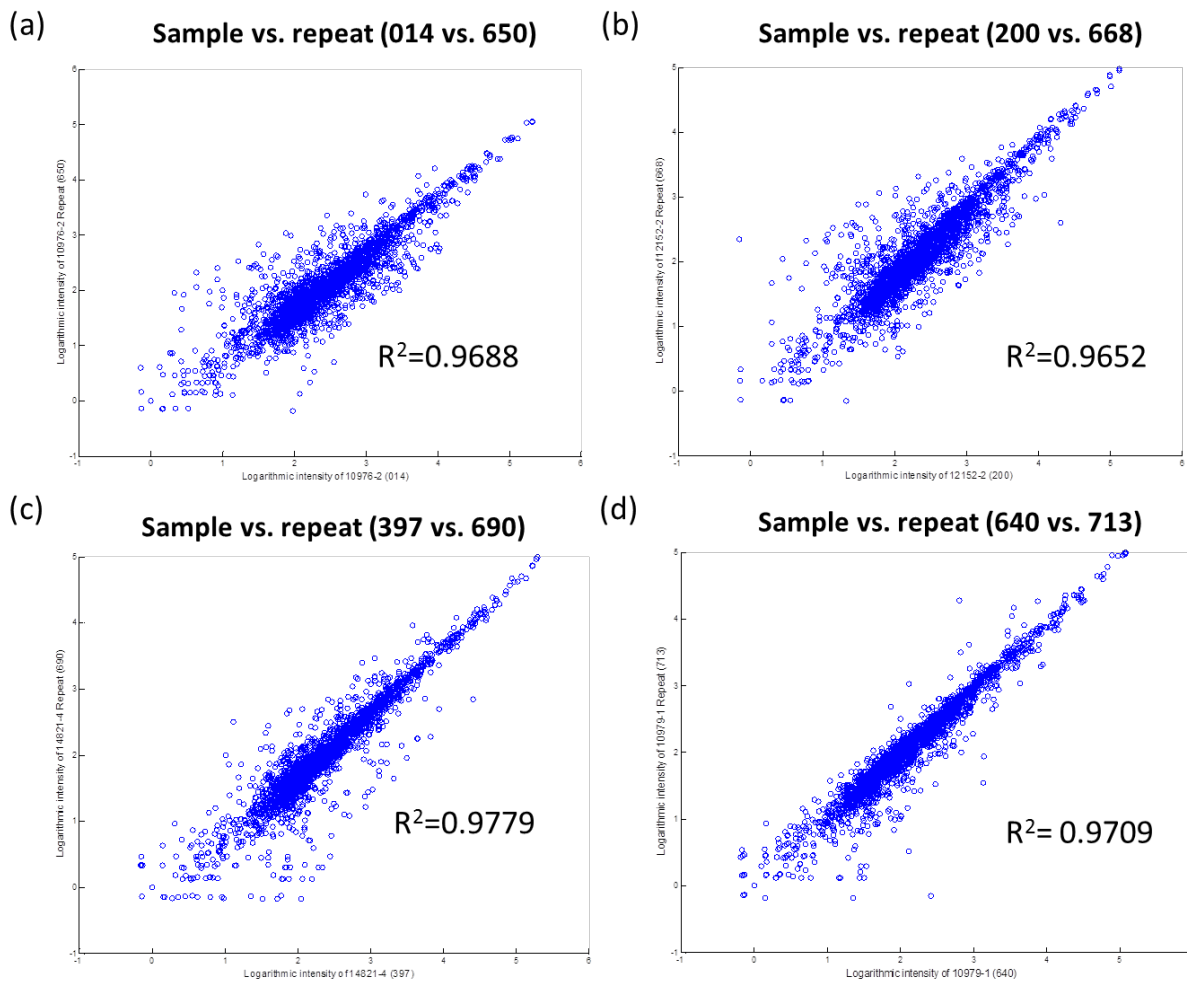

**Fig S1. Evaluation of the reproducibility on samples and their repeats.** Scatter plots of logarithmic intensities of samples and their matching repeats shown in (a-d) represent high correlations (Pearson Correlation > 0.9), indicating high resemblances between samples and the repeated injections.

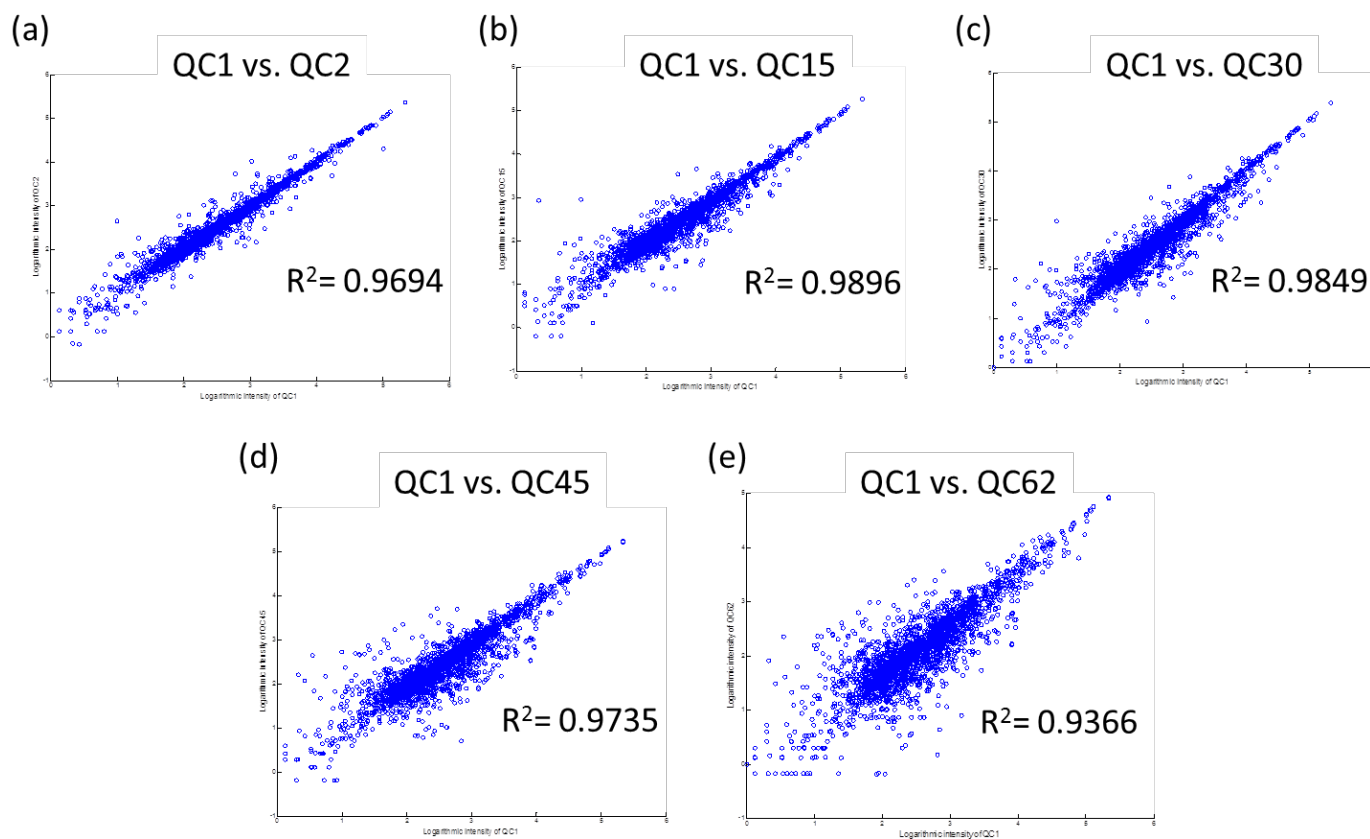

**Fig S2. Evaluation of the reproducibility on QC samples.** Scatter plots of logarithmic intensities of (a) QC1 vs. QC2; (b) QC1 vs. QC15; (c) QC1 vs. QC30; (d) QC1 vs. QC45; and (e) QC1 vs. QC62 exhibit high correlations (Pearson Correlation > 0.9), indicating a high resemblance among QC samples.

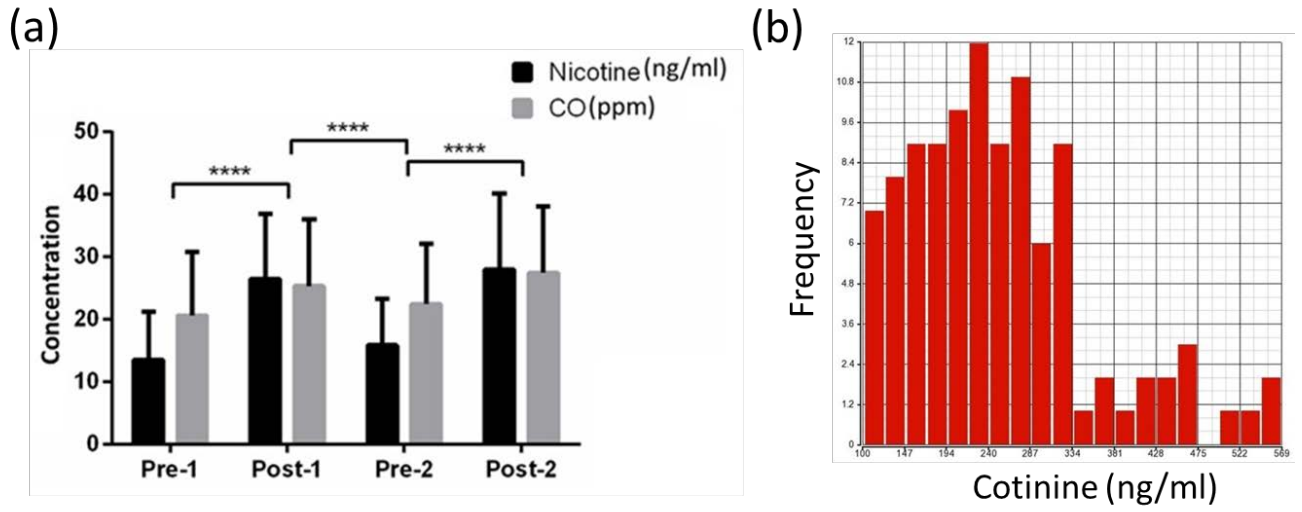

**Fig. S3.** (a) measurements of smoke exposure showed significant increase of nicotine and CO level after 1<sup>st</sup> and 2<sup>nd</sup> cigarette smoking, and decrease levels during the one hour interval, and (b) cotinine levels across subjects.

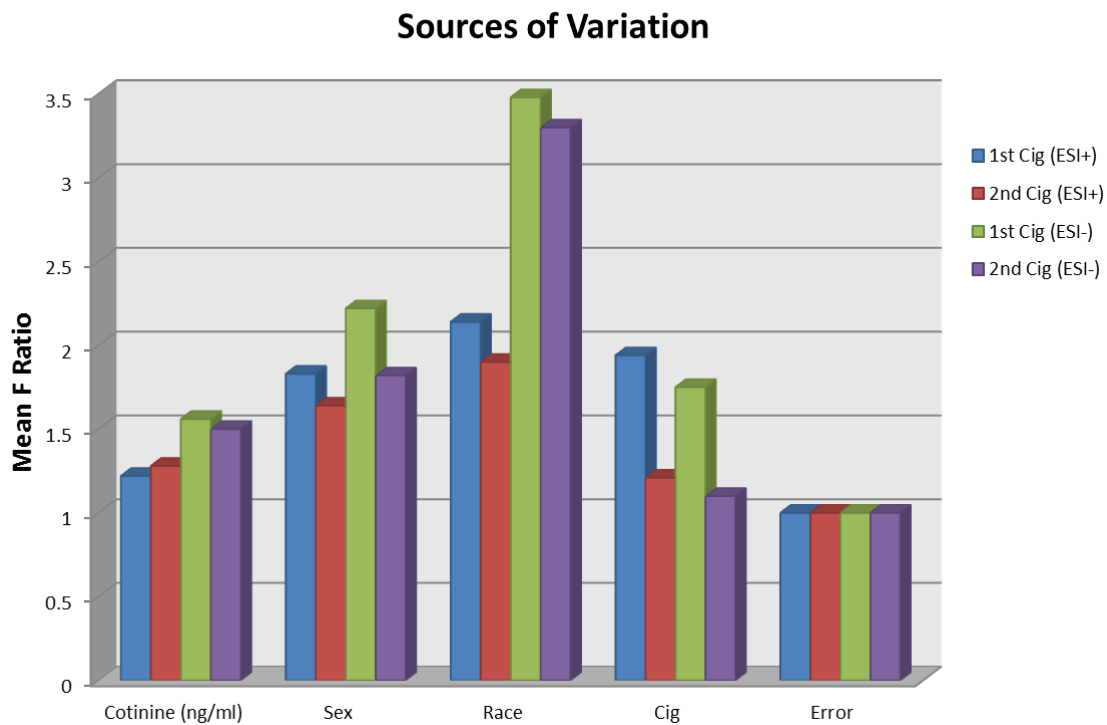

**Fig S4. Sources of Variation plot.** All the factors including cotinine, sex, race, and pre- & post-cigarette (cig) in the ANCOVA model are listed on the X-axis (including random error). The Y-axis represents the Mean F-ratio (variability in the data not explained by the other factors) of all the metabolites.

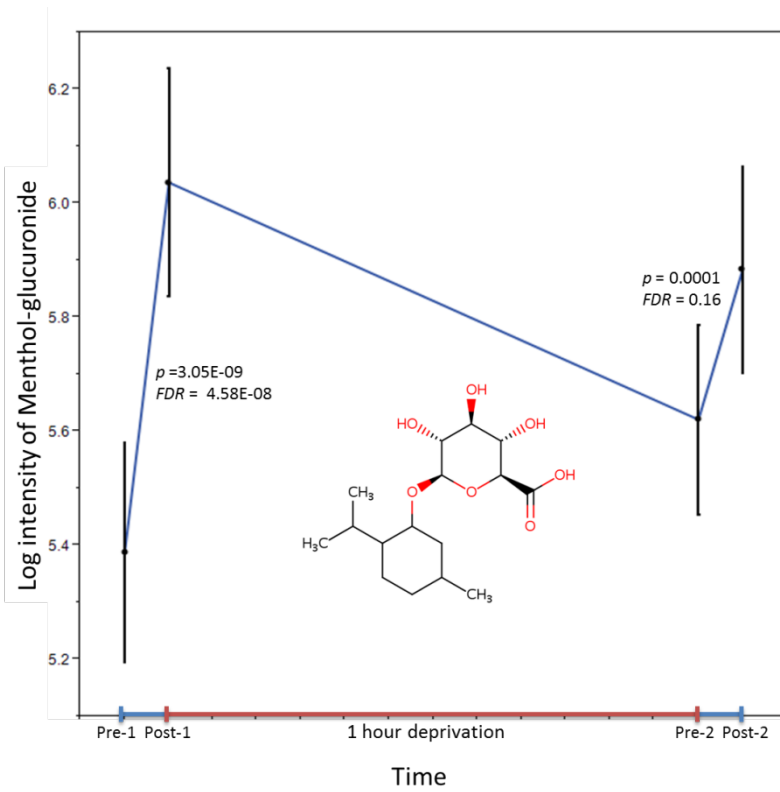

**Fig. S5. Dynamic changes of the menthol-glucuronide from cigarette smoking.**

(a) Menthol-glucuronide ( $q = 4.58\text{E-}08$ )

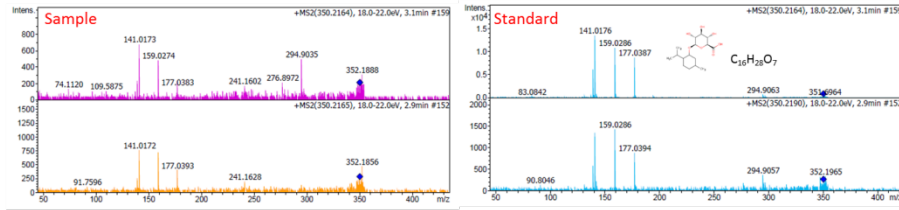

(b) LysoPC(19:0) ( $q = 1.29\text{E-}06$ )

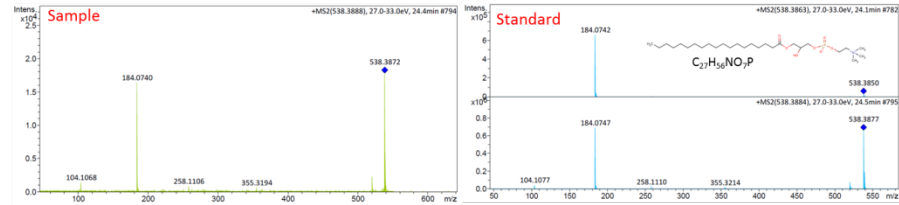

(c) LysoPC(18:0) ( $q = 6.64\text{E-}06$ )

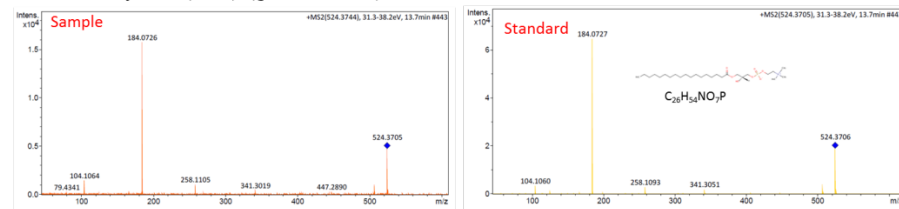

(d) LysoPC(16:0) ( $q = 6.64\text{E-}06$ )

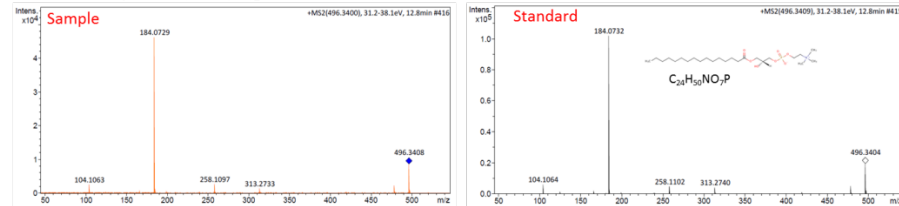

(e) LysoPC(14:0) ( $q = 6.64\text{E-}06$ )

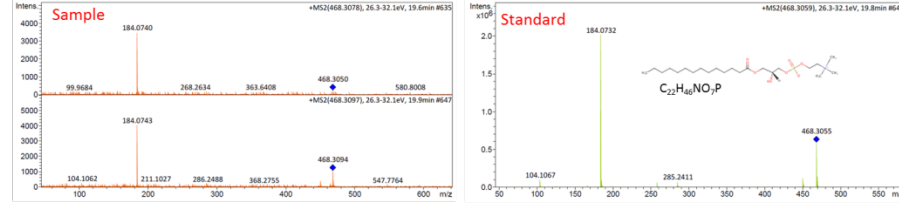

(f) LysoPE(18:0/0:0) ( $q = 9.22\text{E-}06$ )

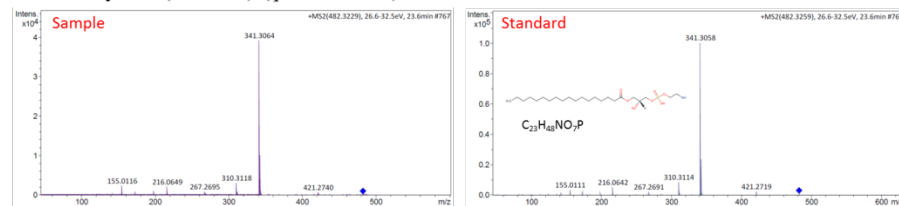

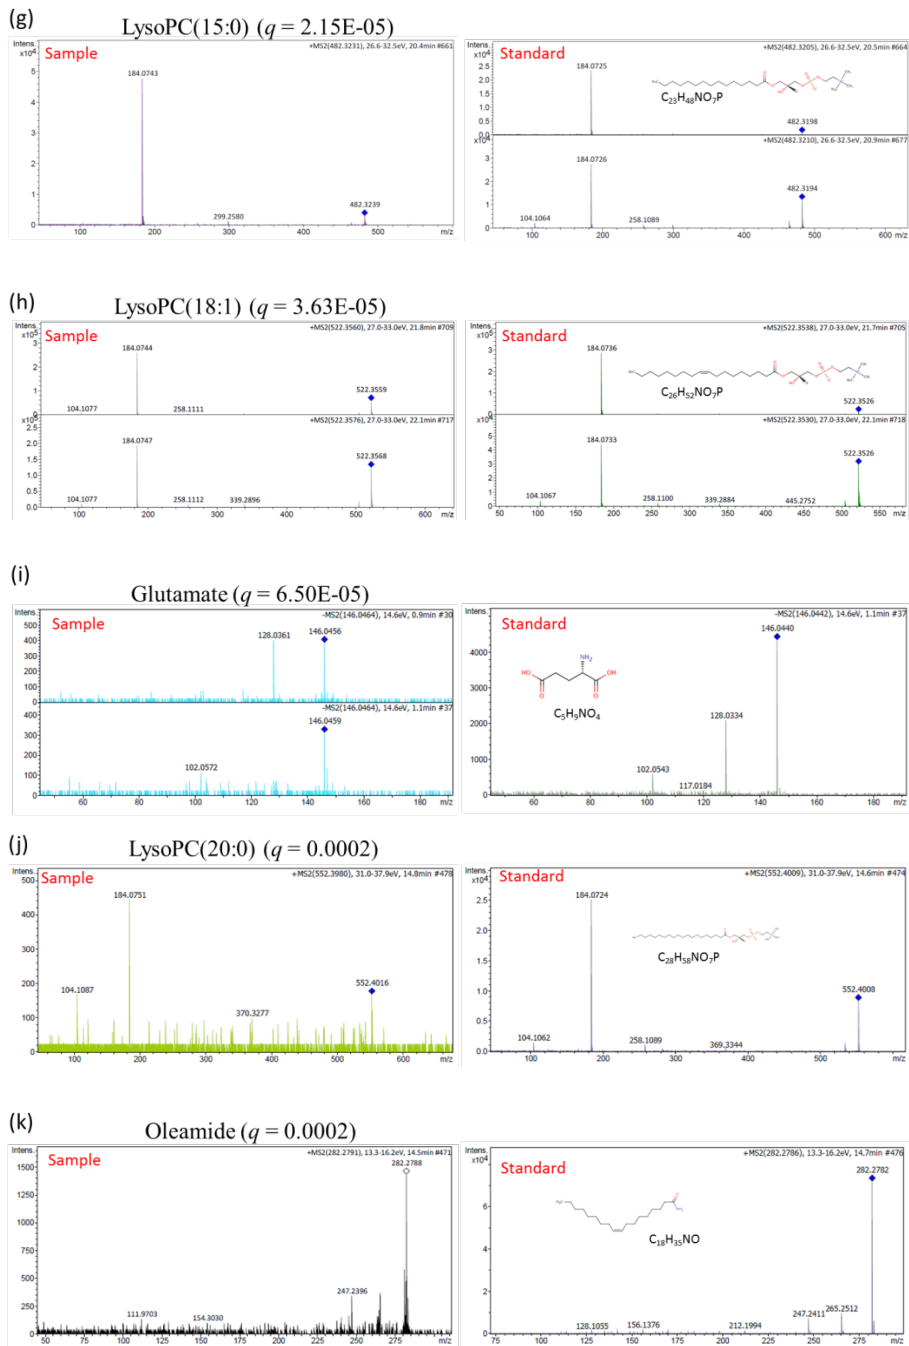

**Fig S6.** Structures and MS/MS spectra of representative metabolites and the authentic standard compounds. (a) menthol-glucuronide, (b) lysoPC(19:0), (c) lysoPC(18:0), (d) lysoPC(16:0), (e) lysoPC(14:0), (f) lysoPE(18:0/0:0), (g) lysoPC(15:0), (h) lysoPC(18:1), (i) glutamate, (j) lysoPC(20:0) and (k) oleamide.



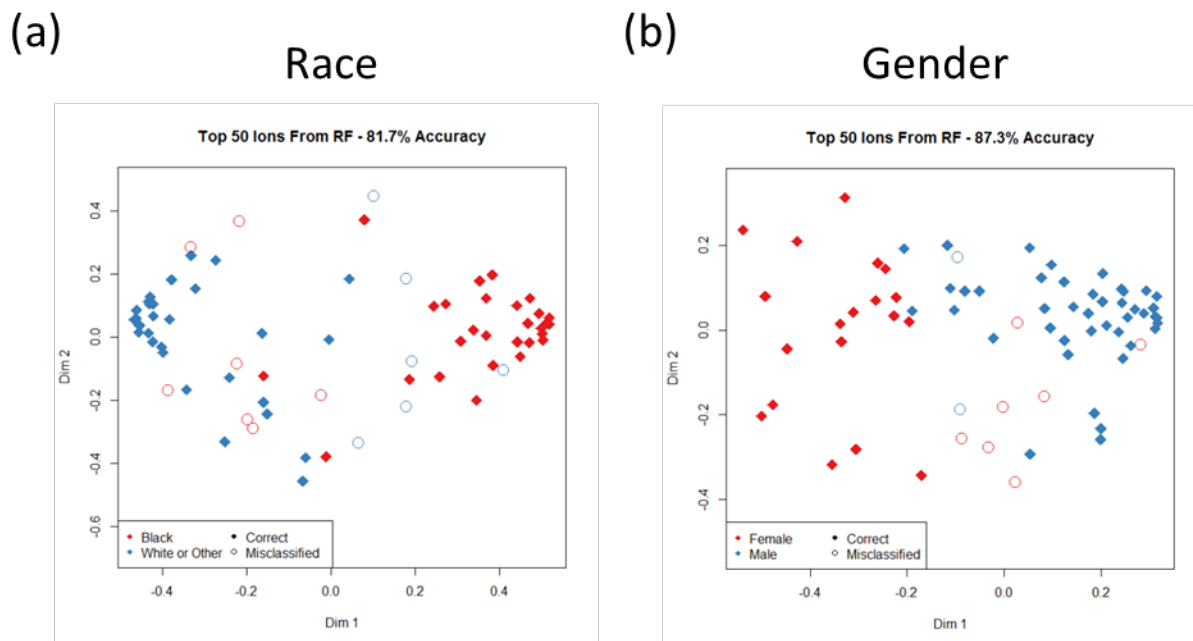

**Fig S7. Race and gender differences evaluated by Random Forests classification.** The forest accuracies were calculated and the sample classifications were presented by multi-dimensional scaling (MDS) plots. In the plots, (a) Blacks (red) vs. White (blue), and (b) females (red) vs. males (blue) were separated with % accuracy in the classifications.

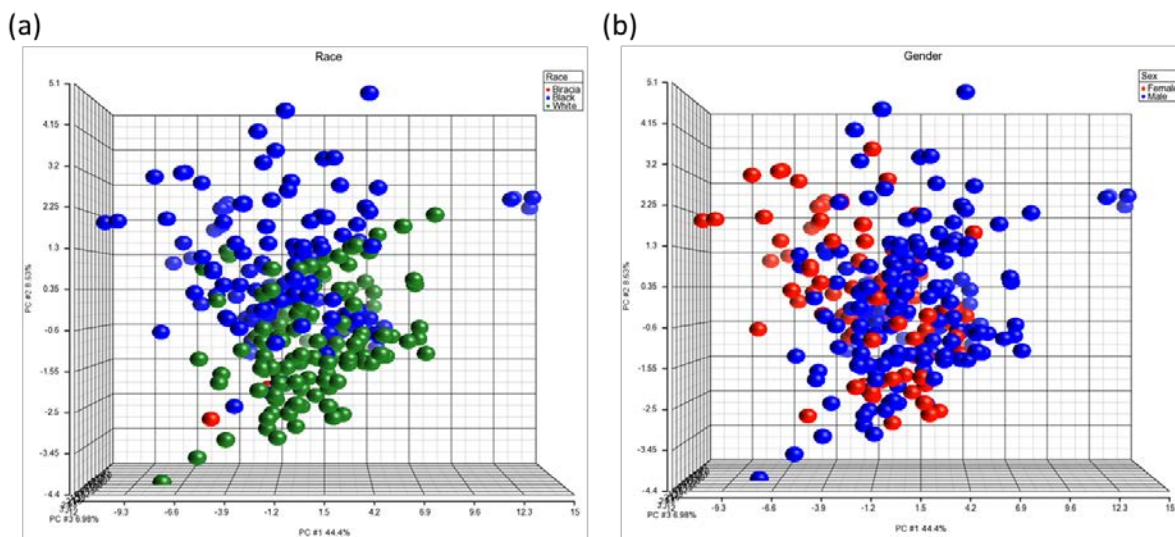

**Fig S8.** 3D scatter plot of PCA score and loadings on the significant metabolites by (a) race and; (b) gender.

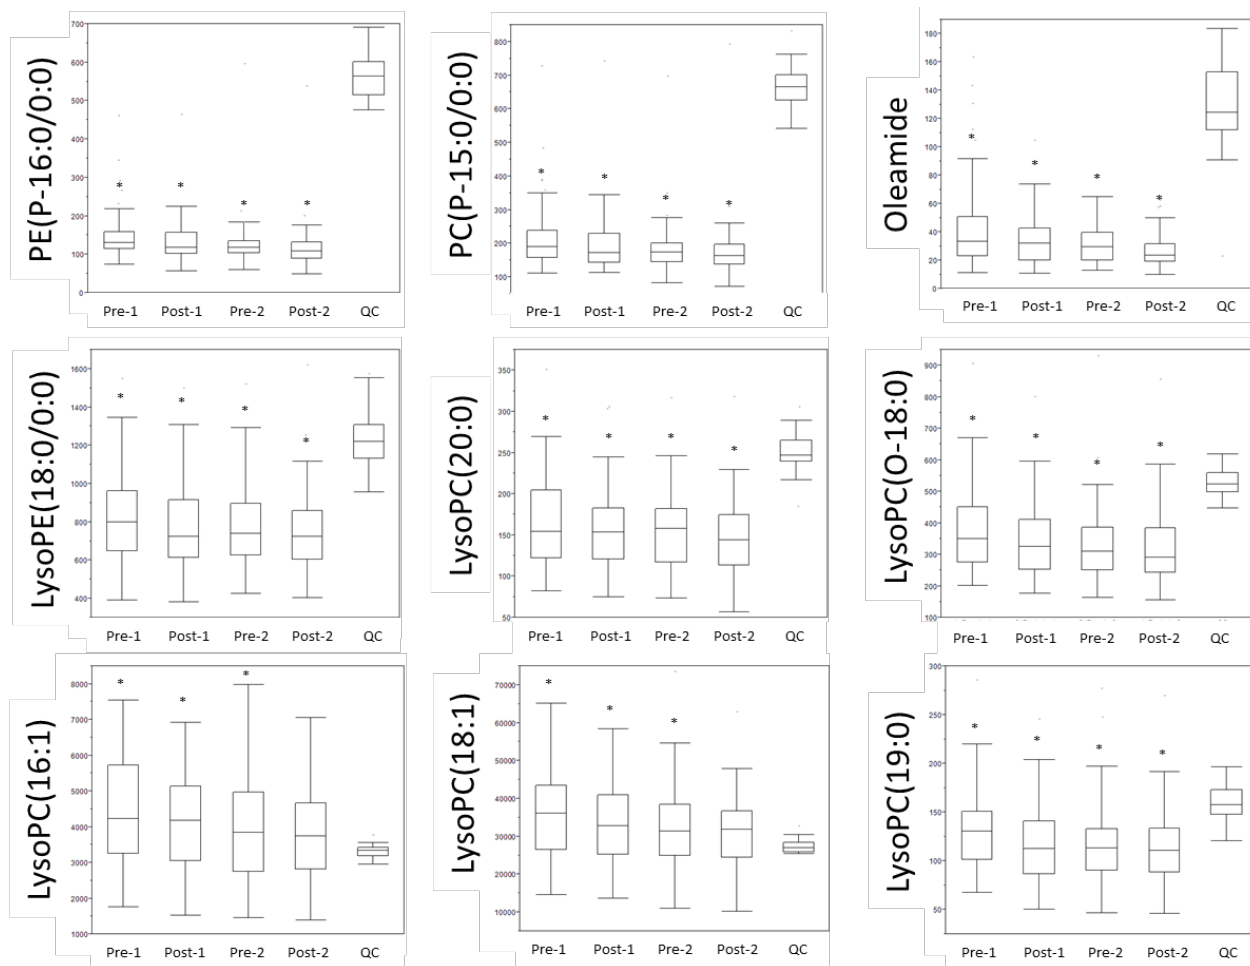

**Fig S9.** Levels of lipid metabolites versus QC samples in this study. Data significant based on two sample t-test with Benjamini-Hochberg correction (FDR < 0.05).

## Glutamate

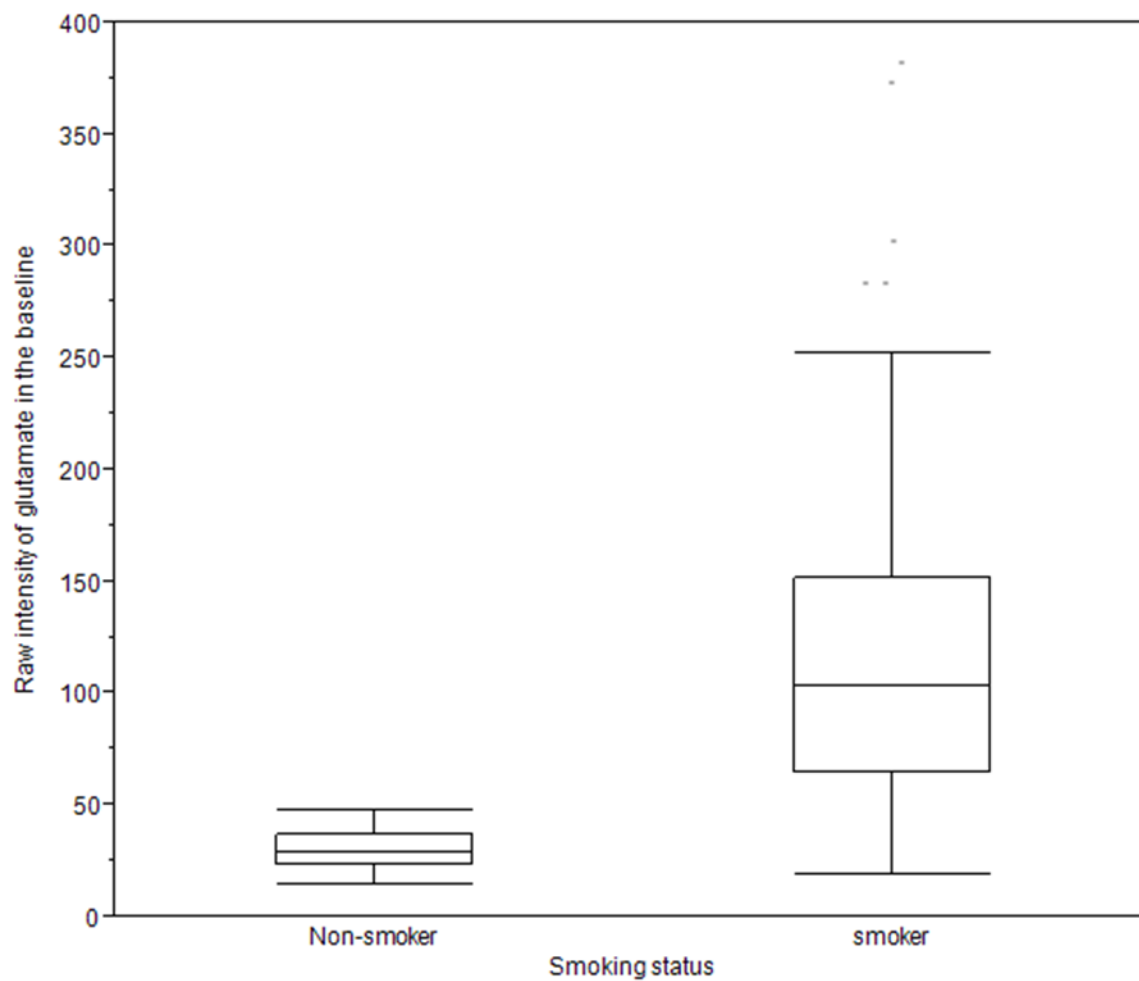

**Fig S10.** Box plots of glutamate levels among non-smokers from QC samples and smokers in the baseline.

## Tables

**Table S1. Significant metabolites after cigarette smoking.**

| Metabolite ID                                                                            | Observed m/z | RT   | Chemical taxonomy                    | Adduct | Compound MW (Da) | Mass difference (Delta) | Post-cig 1 vs. Pre-cig 1 |          |       | Post-cig 2 vs. Pre-cig 2 |          |       |
|------------------------------------------------------------------------------------------|--------------|------|--------------------------------------|--------|------------------|-------------------------|--------------------------|----------|-------|--------------------------|----------|-------|
|                                                                                          |              |      |                                      |        |                  |                         | <i>p</i>                 | <i>q</i> | Trend | <i>p</i>                 | <i>q</i> | Trend |
| Menthol-glucuronide                                                                      | 331.18       | 3.07 | Prenol Lipids                        | M-H    | 332.18           | 0.00045                 | 3.05E-09                 | 4.58E-08 | ↑     | 0.0001                   | 0.16     | ↑     |
| 1 $\alpha$ ,25-dihydroxy-11-(4-hydroxymethylphenyl)-9,11-didehydrovitamin D <sub>3</sub> | 543.34       | 5.52 | Sterol Lipids                        | M+Na   | 520.36           | 0.00626                 | 6.40E-09                 | 6.02E-07 | ↓     | 0.0070                   | 0.48     | ↓     |
| LysoPC(19:0)                                                                             | 538.39       | 5.87 | Glycerophospholipids                 | M+H    | 537.38           | 0.00130                 | 5.14E-08                 | 1.29E-06 | ↓     | 0.0280                   | 0.59     | ↓     |
| 229.05-                                                                                  | 229.05       | 2.71 | Unknown                              |        |                  |                         | 8.64E-08                 | 6.48E-07 | ↑     | 0.0061                   | 0.57     | ↑     |
| 104.10+                                                                                  | 104.10       | 4.87 | Unknown                              |        |                  |                         | 1.33E-07                 | 2.66E-06 | ↓     | 0.0156                   | 0.54     | ↓     |
| LysoPC(18:0)                                                                             | 524.37       | 5.51 | Glycerophospholipids                 | M+H    | 523.36           | 0.00108                 | 4.59E-07                 | 6.64E-06 | ↓     | 0.0224                   | 0.55     | ↓     |
| LysoPC(16:0)                                                                             | 496.34       | 4.87 | Glycerophospholipids                 | M+H    | 495.33           | 0.00087                 | 6.25E-07                 | 6.64E-06 | ↓     | 0.0039                   | 0.42     | ↓     |
| LysoPC(14:0)                                                                             | 468.31       | 4.31 | Glycerophospholipids                 | M+H    | 467.30           | 0.00068                 | 7.32E-07                 | 6.64E-06 | ↓     | 0.0211                   | 0.54     | ↓     |
| LysoPC(16:1)                                                                             | 494.32       | 4.47 | Glycerophospholipids                 | M+H    | 493.32           | 0.00077                 | 7.97E-07                 | 6.64E-06 | ↓     | 0.0022                   | 0.35     | ↓     |
| LysoPE(18:0/0:0)                                                                         | 482.32       | 5.50 | Glycerophospholipids                 | M+H    | 481.32           | 0.00085                 | 1.38E-06                 | 9.22E-06 | ↓     | 0.0195                   | 0.54     | ↓     |
| 2-Octenoylcarnitine                                                                      | 286.20       | 2.41 | Fatty Acid Esters                    | M+H    | 285.19           | 0.00052                 | 4.46E-06                 | 2.03E-05 | ↓     | 0.0355                   | 0.64     | ↓     |
| LysoPC(15:0)                                                                             | 482.32       | 4.58 | Glycerophospholipids                 | M+H    | 481.32           | 0.00063                 | 5.16E-06                 | 2.15E-05 | ↓     | 0.0070                   | 0.48     | ↓     |
| LysoPC(18:1)                                                                             | 522.36       | 5.03 | Glycerophospholipids                 | M+H    | 521.35           | 0.00122                 | 1.14E-05                 | 3.63E-05 | ↓     | 0.0177                   | 0.54     | ↓     |
| 698.2+                                                                                   | 698.29       | 2.15 | Unknown                              |        |                  |                         | 1.81E-05                 | 5.17E-05 | ↑     | 0.0006                   | 0.26     | ↑     |
| 763.98+                                                                                  | 763.98       | 4.87 | Unknown                              |        |                  |                         | 2.12E-05                 | 5.90E-05 | ↓     | 0.0141                   | 0.54     | ↓     |
| Glutamate                                                                                | 146.05       | 0.33 | Amino Acids, Peptides, and Analogues | M-H    | 147.05           | 0.00075                 | 2.67E-05                 | 6.50E-05 | ↓     | 0.0114                   | 0.70     | ↓     |
| 184.07+                                                                                  | 184.07       | 5.38 | Unknown                              |        |                  |                         | 5.42E-05                 | 0.0001   | ↓     | 0.0242                   | 0.57     | ↓     |
| LysoPC(20:2)                                                                             | 548.37       | 5.20 | Glycerophospholipids                 | M+H    | 547.36           | 0.00002                 | 6.22E-05                 | 0.0001   | ↓     | 0.0280                   | 0.59     | ↓     |
| Chenodeoxycholic acid sulfate                                                            | 507.22       | 4.17 | Sterol Lipids                        | M+Cl   | 472.25           | 0.00533                 | 8.00E-05                 | 0.0001   | ↓     | 0.0074                   | 0.59     | ↓     |
| 508.34+                                                                                  | 508.34       | 4.73 | Unknown                              |        |                  |                         | 8.30E-05                 | 0.0002   | ↓     | 0.0208                   | 0.54     | ↓     |
| LysoPC(20:0)                                                                             | 552.40       | 6.22 | Glycerophospholipids                 | M+H    | 551.40           | 0.00081                 | 9.50E-05                 | 0.0002   | ↓     | 0.0025                   | 0.35     | ↓     |
| 272.66+                                                                                  | 272.66       | 5.52 | Unknown                              |        |                  |                         | 0.0001                   | 0.0002   | ↓     | 0.0396                   | 0.65     | ↓     |
| Oleamide                                                                                 | 282.28       | 4.36 | Fatty Amides                         | M+H    | 281.27           | 0.00044                 | 0.0001                   | 0.0002   | ↓     | 0.0004                   | 0.24     | ↓     |
| 512.36+                                                                                  | 512.36       | 5.18 | Unknown                              |        |                  |                         | 0.0002                   | 0.0003   | ↓     | 0.0220                   | 0.55     | ↓     |
| 543.84+                                                                                  | 543.84       | 5.52 | Unknown                              |        |                  |                         | 0.0003                   | 0.0005   | ↓     | 0.0010                   | 0.28     | ↓     |
| LysoPC(O-18:0)                                                                           | 510.39       | 5.72 | Glycerophospholipids                 | M+H    | 509.38           | 0.00073                 | 0.0003                   | 0.0005   | ↓     | 0.0158                   | 0.54     | ↓     |
| 483.36+                                                                                  | 483.36       | 5.04 | Unknown                              |        |                  |                         | 0.0006                   | 0.0008   | ↓     | 0.0230                   | 0.56     | ↓     |
| PC(P-15:0/0:0)                                                                           | 466.33       | 5.69 | Glycerophospholipids                 | M+H    | 427.37           | 0.00059                 | 0.0006                   | 0.0008   | ↓     | 0.0013                   | 0.31     | ↓     |
| 531.41+                                                                                  | 531.41       | 8.19 | Unknown                              |        |                  |                         | 0.0007                   | 0.0008   | ↑     | 0.0110                   | 0.53     | ↑     |
| 772.96+                                                                                  | 772.96       | 4.87 | Unknown                              |        |                  |                         | 0.0008                   | 0.0009   | ↓     | 0.0109                   | 0.53     | ↓     |
| PE(P-16:0/0:0)                                                                           | 438.30       | 5.01 | Glycerophospholipids                 | M+H    | 437.29           | 0.00044                 | 0.0013                   | 0.0015   | ↓     | 0.0011                   | 0.28     | ↓     |

**Table S2. Correlation coefficients of significant metabolites in the baseline to baseline plasma cotinine levels.**

| Metabolite ID                                                                | All smokers |              | Menthol |              | Non-menthol |              |
|------------------------------------------------------------------------------|-------------|--------------|---------|--------------|-------------|--------------|
|                                                                              | $r^1$       | $p^2$        | $r$     | $p$          | $r$         | $p$          |
| 272.66+                                                                      | -0.33       | <b>0.006</b> | -0.12   | 0.455        | -0.60       | <b>0.001</b> |
| 104.10+                                                                      | -0.33       | <b>0.006</b> | -0.13   | 0.405        | -0.56       | <b>0.003</b> |
| 1 $\alpha$ ,25-dihydroxy-11-(4-hydroxymethylphenyl)-9,11-didehydrovitamin D3 | -0.33       | <b>0.007</b> | -0.24   | 0.133        | -0.43       | <b>0.027</b> |
| 184.07+                                                                      | -0.29       | <b>0.015</b> | -0.14   | 0.395        | -0.50       | <b>0.008</b> |
| LysoPC (19:0)                                                                | -0.28       | <b>0.022</b> | -0.14   | 0.371        | -0.37       | 0.055        |
| Menthol-glucuronide                                                          | 0.20        | <b>0.043</b> | 0.31    | <b>0.008</b> | 0.11        | 0.524        |
| Oleamide                                                                     | -0.23       | 0.061        | -0.19   | 0.233        | -0.32       | 0.104        |
| 543.84+                                                                      | -0.22       | 0.072        | -0.14   | 0.381        | -0.31       | 0.112        |
| 508.34+                                                                      | -0.21       | 0.080        | -0.15   | 0.339        | -0.29       | 0.135        |
| LysoPC(16:1)                                                                 | -0.21       | 0.085        | -0.09   | 0.590        | -0.40       | <b>0.040</b> |
| LysoPC(20:0)                                                                 | -0.20       | 0.095        | -0.08   | 0.598        | -0.36       | 0.067        |
| LysoPC(18:0)                                                                 | -0.19       | 0.118        | -0.12   | 0.463        | -0.30       | 0.132        |
| 512.36+                                                                      | -0.18       | 0.135        | -0.11   | 0.486        | -0.29       | 0.138        |
| 772.96+                                                                      | -0.18       | 0.146        | -0.19   | 0.233        | -0.18       | 0.365        |
| 763.98+                                                                      | -0.17       | 0.156        | -0.15   | 0.360        | -0.22       | 0.268        |
| LysoPC(18:1)                                                                 | -0.17       | 0.165        | -0.15   | 0.353        | -0.18       | 0.369        |
| LysoPC(16:0)                                                                 | -0.16       | 0.186        | -0.07   | 0.642        | -0.25       | 0.213        |
| 483.36+                                                                      | -0.15       | 0.213        | 0.03    | 0.830        | -0.39       | <b>0.047</b> |
| Chenodeoxycholic acid sulfate                                                | -0.10       | 0.289        | -0.05   | 0.671        | -0.10       | 0.577        |
| LysoPC(15:0)                                                                 | -0.13       | 0.291        | 0.02    | 0.919        | -0.23       | 0.249        |
| 229.05-                                                                      | 0.10        | 0.302        | -0.03   | 0.799        | 0.43        | <b>0.011</b> |
| LysoPC(20:2)                                                                 | -0.11       | 0.393        | 0.00    | 0.998        | -0.23       | 0.252        |
| LysoPE(18:0/0:0)                                                             | -0.09       | 0.454        | 0.01    | 0.960        | -0.25       | 0.208        |
| 2-Octenoylcarnitine                                                          | 0.08        | 0.499        | 0.04    | 0.815        | 0.14        | 0.471        |
| PE(P-16:0/0:0)                                                               | 0.08        | 0.512        | 0.10    | 0.523        | 0.04        | 0.844        |
| LysoPC(14:0)                                                                 | -0.08       | 0.536        | 0.06    | 0.716        | -0.23       | 0.243        |
| LysoPC(O-18:0)                                                               | -0.05       | 0.664        | 0.05    | 0.749        | -0.27       | 0.177        |
| 698.29+                                                                      | -0.05       | 0.670        | -0.01   | 0.940        | -0.23       | 0.248        |
| PC(P-15:0/0:0)                                                               | -0.05       | 0.677        | -0.03   | 0.850        | -0.05       | 0.815        |
| 531.41+                                                                      | 0.01        | 0.913        | 0.03    | 0.834        | -0.05       | 0.812        |
| Glutamate                                                                    | -0.01       | 0.941        | 0.01    | 0.934        | -0.08       | 0.660        |

\* Data significant at  $p < 0.05$ .

<sup>1,2</sup>  $r$  and  $p$ -value (correlation) were computed based on Spearman's rank correlation coefficient.

**Table S3. Correlation of menthol-glucuronide in the baseline to other metabolites.**

| Metabolites                                                                  | $r^1$ | $p^2$           |
|------------------------------------------------------------------------------|-------|-----------------|
| 229.05-                                                                      | 0.47  | <b>3.95E-07</b> |
| 2-Octenoylcarnitine                                                          | 0.37  | <b>0.0018</b>   |
| Glutamate                                                                    | 0.30  | <b>0.0020</b>   |
| Oleamide                                                                     | -0.36 | <b>0.0026</b>   |
| LysoPC(16:1)                                                                 | -0.31 | <b>0.0096</b>   |
| 508.34+                                                                      | -0.28 | <b>0.0224</b>   |
| Chenodeoxycholic acid sulfate                                                | 0.19  | 0.0543          |
| LysoPC(20:2)                                                                 | -0.19 | 0.1261          |
| 104.10+                                                                      | -0.17 | 0.1633          |
| 763.98+                                                                      | -0.16 | 0.1855          |
| LysoPC(18:1)                                                                 | -0.14 | 0.2703          |
| 698.29+                                                                      | -0.12 | 0.3171          |
| LysoPC(18:0)                                                                 | 0.12  | 0.3463          |
| LysoPC(15:0)                                                                 | -0.10 | 0.3963          |
| PE(P-16:0/0:0)                                                               | 0.10  | 0.4012          |
| PC(P-15:0/0:0)                                                               | 0.10  | 0.4361          |
| LysoPC(14:0)                                                                 | -0.09 | 0.4477          |
| 543.84+                                                                      | 0.09  | 0.4746          |
| 772.96+                                                                      | -0.08 | 0.5216          |
| 531.41+                                                                      | 0.08  | 0.5318          |
| LysoPC(19:0)                                                                 | -0.06 | 0.6177          |
| 512.36+                                                                      | -0.06 | 0.6444          |
| 272.66+                                                                      | -0.04 | 0.7248          |
| LysoPC(16:0)                                                                 | -0.04 | 0.7693          |
| LysoPC(O-18:0)                                                               | -0.02 | 0.8904          |
| 483.36+                                                                      | 0.01  | 0.9051          |
| 1 $\alpha$ ,25-dihydroxy-11-(4-hydroxymethylphenyl)-9,11-didehydrovitamin D3 | -0.01 | 0.9134          |
| LysoPE(18:0/0:0)                                                             | 0.01  | 0.9402          |
| 184.07+                                                                      | 0.00  | 0.9850          |
| LysoPC(20:0)                                                                 | 0.00  | 0.9978          |

\*Data significant at  $p < 0.05$ .

<sup>1,2</sup>  $r$  and  $p$ -value (correlation) were computed based on Spearman's rank correlation coefficient.

**Table S4. Correlation coefficients of metabolite boosts to nicotine and CO boosts.**

| Metabolite ID                                                           | Nicotine boost |              | CO boost |              |
|-------------------------------------------------------------------------|----------------|--------------|----------|--------------|
|                                                                         | $r^1$          | $p^2$        | $r$      | $p$          |
| 19:0 Lyso PC                                                            | 0.369          | <b>0.005</b> | 0.164    | 0.204        |
| LysoPC(20:2)                                                            | 0.323          | <b>0.014</b> | 0.064    | 0.623        |
| 272.66+                                                                 | 0.280          | <b>0.035</b> | 0.194    | 0.131        |
| Menthol-glucuronide                                                     | 0.264          | <b>0.042</b> | 0.227    | <b>0.035</b> |
| LysoPC(14:0)                                                            | 0.213          | 0.111        | 0.129    | 0.319        |
| LysoPC(15:0)                                                            | 0.212          | 0.113        | 0.001    | 0.993        |
| 184.07+                                                                 | 0.192          | 0.153        | 0.108    | 0.403        |
| LysoPC(20:0)                                                            | 0.186          | 0.167        | 0.110    | 0.393        |
| 543.84+                                                                 | 0.174          | 0.196        | 0.155    | 0.229        |
| LysoPC(18:0)                                                            | 0.167          | 0.215        | 0.243    | 0.057        |
| 512.36+                                                                 | 0.166          | 0.218        | -0.007   | 0.959        |
| PE(P-16:0/0:0)                                                          | 0.156          | 0.247        | 0.015    | 0.908        |
| Chenodeoxycholic acid sulfate                                           | -0.147         | 0.261        | 0.048    | 0.660        |
| 508.34+                                                                 | 0.151          | 0.263        | -0.035   | 0.786        |
| 763.98+                                                                 | 0.144          | 0.285        | -0.012   | 0.926        |
| 104.10+                                                                 | 0.143          | 0.288        | 0.014    | 0.914        |
| Oleamide                                                                | 0.138          | 0.306        | 0.293    | <b>0.021</b> |
| 531.41+                                                                 | 0.111          | 0.411        | 0.383    | <b>0.002</b> |
| LysoPC(16:0)                                                            | 0.104          | 0.441        | 0.167    | 0.194        |
| LysoPC(16:1)                                                            | 0.103          | 0.448        | 0.095    | 0.462        |
| Glutamate                                                               | -0.089         | 0.500        | 0.068    | 0.533        |
| LysoPC(18:1)                                                            | 0.085          | 0.527        | 0.200    | 0.119        |
| 229.05-                                                                 | 0.083          | 0.528        | 0.089    | 0.410        |
| LysoPC(O-18:0)                                                          | 0.067          | 0.618        | -0.035   | 0.787        |
| 483.36+                                                                 | 0.057          | 0.672        | 0.288    | <b>0.023</b> |
| 698.29+                                                                 | 0.021          | 0.875        | -0.091   | 0.482        |
| 1?,25-dihydroxy-11-(4-hydroxymethylphenyl)-<br>9,11-didehydrovitamin D3 | 0.020          | 0.884        | 0.143    | 0.268        |
| 772.96+                                                                 | -0.014         | 0.917        | -0.219   | 0.087        |
| 2-Octenoylcarnitine                                                     | -0.013         | 0.922        | -0.013   | 0.917        |
| LysoPE(18:0/0:0)                                                        | -0.012         | 0.930        | 0.152    | 0.237        |
| PC(P-15:0/0:0)                                                          | -0.005         | 0.972        | 0.000    | 0.997        |

\*Data significant at  $p < 0.05$ .

<sup>1,2</sup>  $r$  and  $p$ -value (correlation) were computed based on Spearman's rank correlation coefficient.
